# Supplementary material
Source: PubMed Central journal article supplement (PMC2964095)
Supplement: supp_dev.036673_DEV036673TableS1.pdf [file supp_dev.036673_DEV036673TableS1.pdf]

Table S1. Oligonucleotide primer sequences

| Final plasmid                             | Insert                                                     | Purpose                                        | Sequence (5' to 3')                                           |
|-------------------------------------------|------------------------------------------------------------|------------------------------------------------|---------------------------------------------------------------|
| HW83                                      | AP2 3' region                                              | Exon sense                                     | TACGATGAGGAACTCAATGCCG                                        |
| AP2 in situ probe                         | AP2 full length                                            | 3' UTR antisense                               | TCTAGAGTAACCGATGGAGGGAAAAAGATT                                |
|                                           |                                                            | 5' UTR sense                                   | GAACCTTCAAAGATCAAAATCTAGAAACCA                                |
| HW216                                     | MIM172                                                     | Exon antisense                                 | GATTCAAGAAGGTTCATGAGAGGAGG                                    |
|                                           |                                                            | Mutagenesis sense                              | CTAGAATCTTGAACCTCGATGCTGCATTTTCTAGAGGGAGATAA                  |
| HW235                                     | amiR-AP2                                                   | Mutagenesis antisense                          | AAATGCAGCATCGAGTTCAAGATTCTAGCTTCGGTCCCCTCG                    |
|                                           |                                                            | miRNA sense                                    | GATACGTTGGTAGCTTACGCGGTCTCTCTTTGTATTCC                        |
|                                           |                                                            | miRNA antisense                                | GACCGCGTAAAGCTACCAACGTATCAAAGAGAATCAATGA                      |
|                                           |                                                            | miRNA* sense                                   | GACCACGTAAGCTAGCAACGTTTACAGGTCGTGATATG                        |
| HW209/210                                 | amiR-AG-1                                                  | miRNA* antisense                               | GAAACGTTGCTAGCTTACGTGGTCTACATATATATTCT                        |
|                                           |                                                            | miRNA sense                                    | GATTGTTGATAACTGTGCGTTTCTCTCTTTGTATTCC                         |
|                                           |                                                            | miRNA antisense                                | GAAAACGCACAGTATTATCAACAATCAAAGAGAATCAATGA                     |
|                                           |                                                            | miRNA* sense                                   | GAAAAGCACAGTATTTTCAACATTCACAGGTCGTGATATG                      |
| HW222                                     | amiR-AG-2                                                  | miRNA* antisense                               | GAATGTTGAAAATACTGTGCTTTTCTACATATATATTCT                       |
|                                           |                                                            | miRNA sense                                    | GATTACACTAACTGGAGAGCGCTCTCTCTTTGTATTCC                        |
|                                           |                                                            | miRNA antisense                                | GAGCGCTCTCCAGTTAGTGTAATCAAAGAGAATCAATGA                       |
|                                           |                                                            | miRNA* sense                                   | GAGCACTCTCCAGTTTGTGTAATTCACAGGTCGTGATATG                      |
| HW319                                     | pAP2:AP2::GUS                                              | miRNA* antisense                               | GAATTACACAAACTGGAGAGTGCTCTACATATATATTCT                       |
|                                           |                                                            | AP2 promoter sense with <i>attB4</i> site      | * <b>GGGGACAAC</b> TTTGTATAGAAAAGTTGGGGTCCCAAGCCATATCGTAA     |
|                                           |                                                            | AP2 promoter antisense with <i>attB1r</i> site | * <b>GGGGACTG</b> CTTTTTGTACAAACTGTTTTTTTTGTTTTTTTTGGTTTCTTG  |
|                                           |                                                            | AP2 gene sense with <i>attB1</i> site          | * <b>GGGGACAAG</b> TTGTACAAAAAGCAGGCTGTATGTGGGATCTAAACGACGC   |
|                                           |                                                            | AP2 gene antisense with <i>attB2</i> site      | * <b>GGGGACC</b> ACTTTGTACAAGAAAGCTGGGTGAGAAGGTCTCATGAGAGGAGG |
| GUS gene sense with <i>attB2r</i> site    | * <b>GGGGACAG</b> CTTTCTGTACAAAGTGGGGATGTTACGTCCTGTAGAAAC  |                                                |                                                               |
| GUS gene antisense with <i>attB3</i> site | * <b>GGGGACA</b> ACTTTGTATAATAAAGTTGTTTCATTGTTTGCCTCCTGCTG |                                                |                                                               |

\*Sequences in bold indicate sites added for recombination using the Gateway (Invitrogen) technology.
