# Supplementary material
Source: PubMed Central journal article supplement (PMC2964095)
Supplement: supp_dev.036673_DEV036673TableS2.pdf [file supp_dev.036673_DEV036673TableS2.pdf]

**Table S2. Frequency of petaloid stamens in the first 10 flowers of T1 plants**

| Number of flowers with at least one petaloid stamen | Number of plants in each group |                    |                 |                  |
|-----------------------------------------------------|--------------------------------|--------------------|-----------------|------------------|
|                                                     | <i>p35S</i> (empty)            | <i>pAP3:MIM172</i> | <i>pAP3:AP2</i> | <i>pAP3:rAP2</i> |
| 0-2                                                 | 12                             | 9                  | 7               | 6                |
| 3-5                                                 | 0                              | 4                  | 1               | 2                |
| 6-10                                                | 0                              | 2                  | 0               | 8                |
| Ectopic organ formation                             | 0                              | 0                  | 0               | 3                |
| Total number                                        | 12                             | 15                 | 8               | 19               |
