# Supplementary material
Source: PubMed Central journal article supplement (PMC2964095)

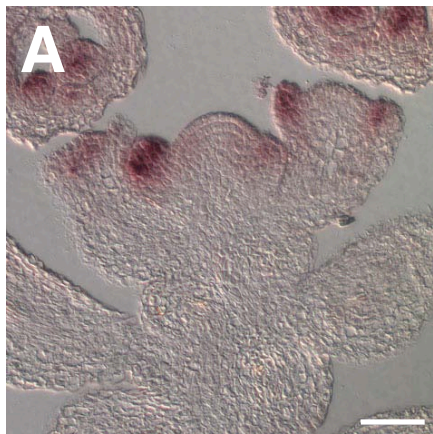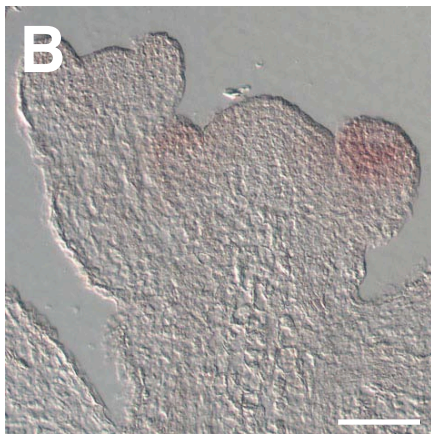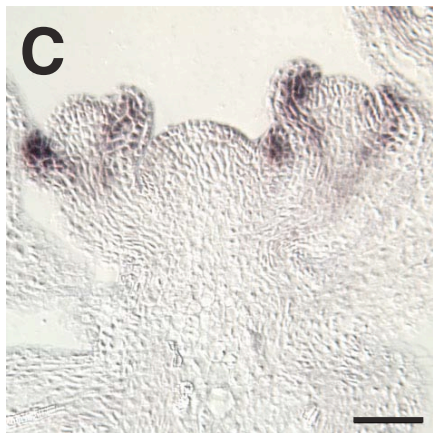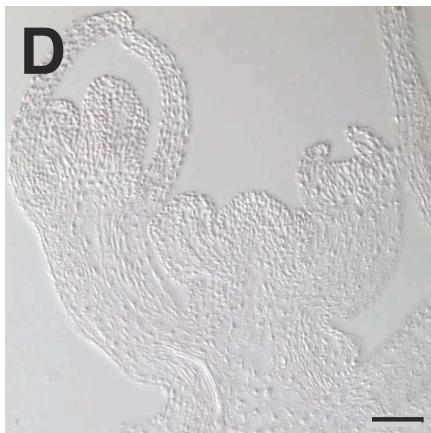

Supplement: supp_dev.036673_DEV036673FigS1.pdf [file supp_dev.036673_DEV036673FigS1.pdf]

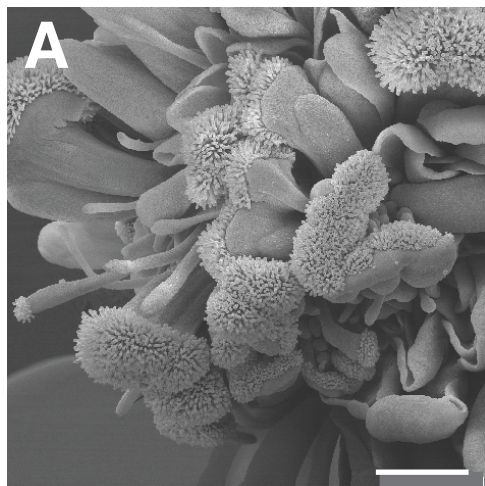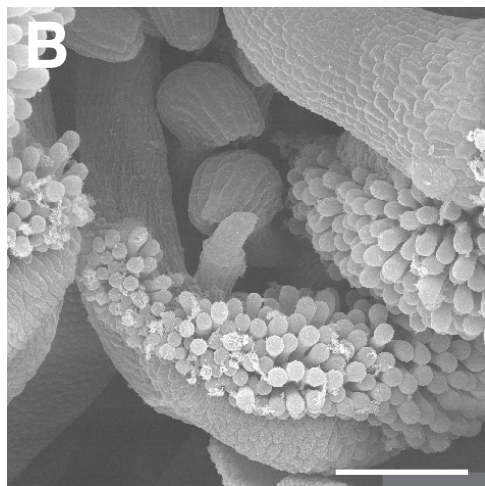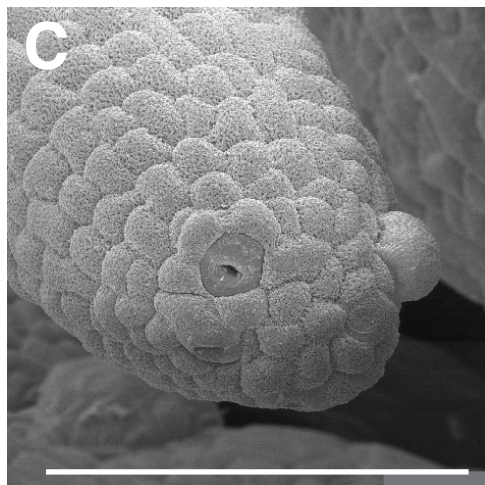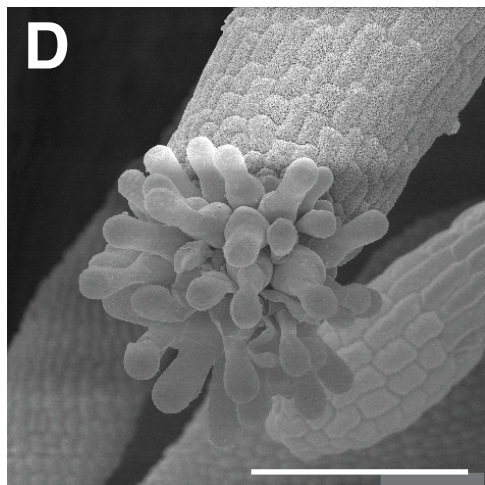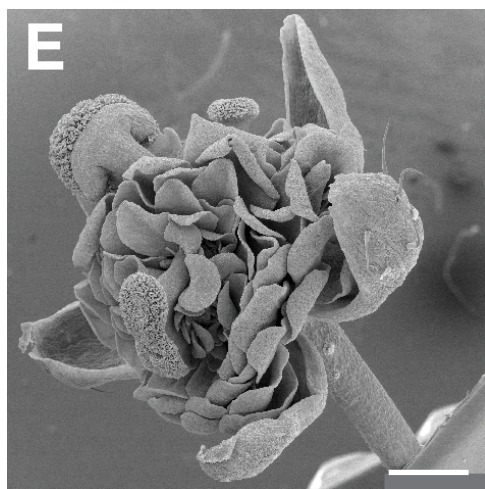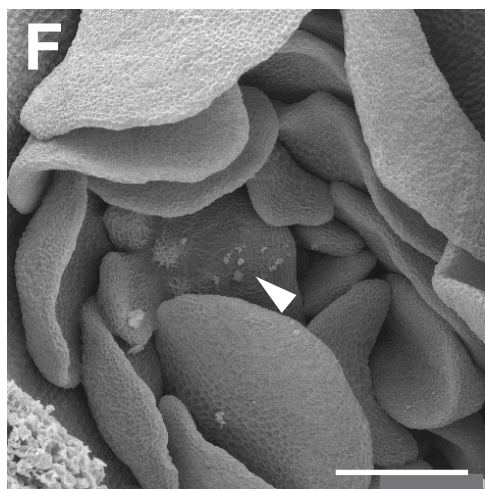

Supplement: supp_dev.036673_DEV036673FigS2.pdf [file supp_dev.036673_DEV036673FigS2.pdf]
